# Supplementary material
Source: Research Square preprint supplement (doi:10.21203/rs.3.rs-9212182/v1)
Supplement: Supplementary file 1 [file a5d565a71191f7654ad0aa2e.pdf]

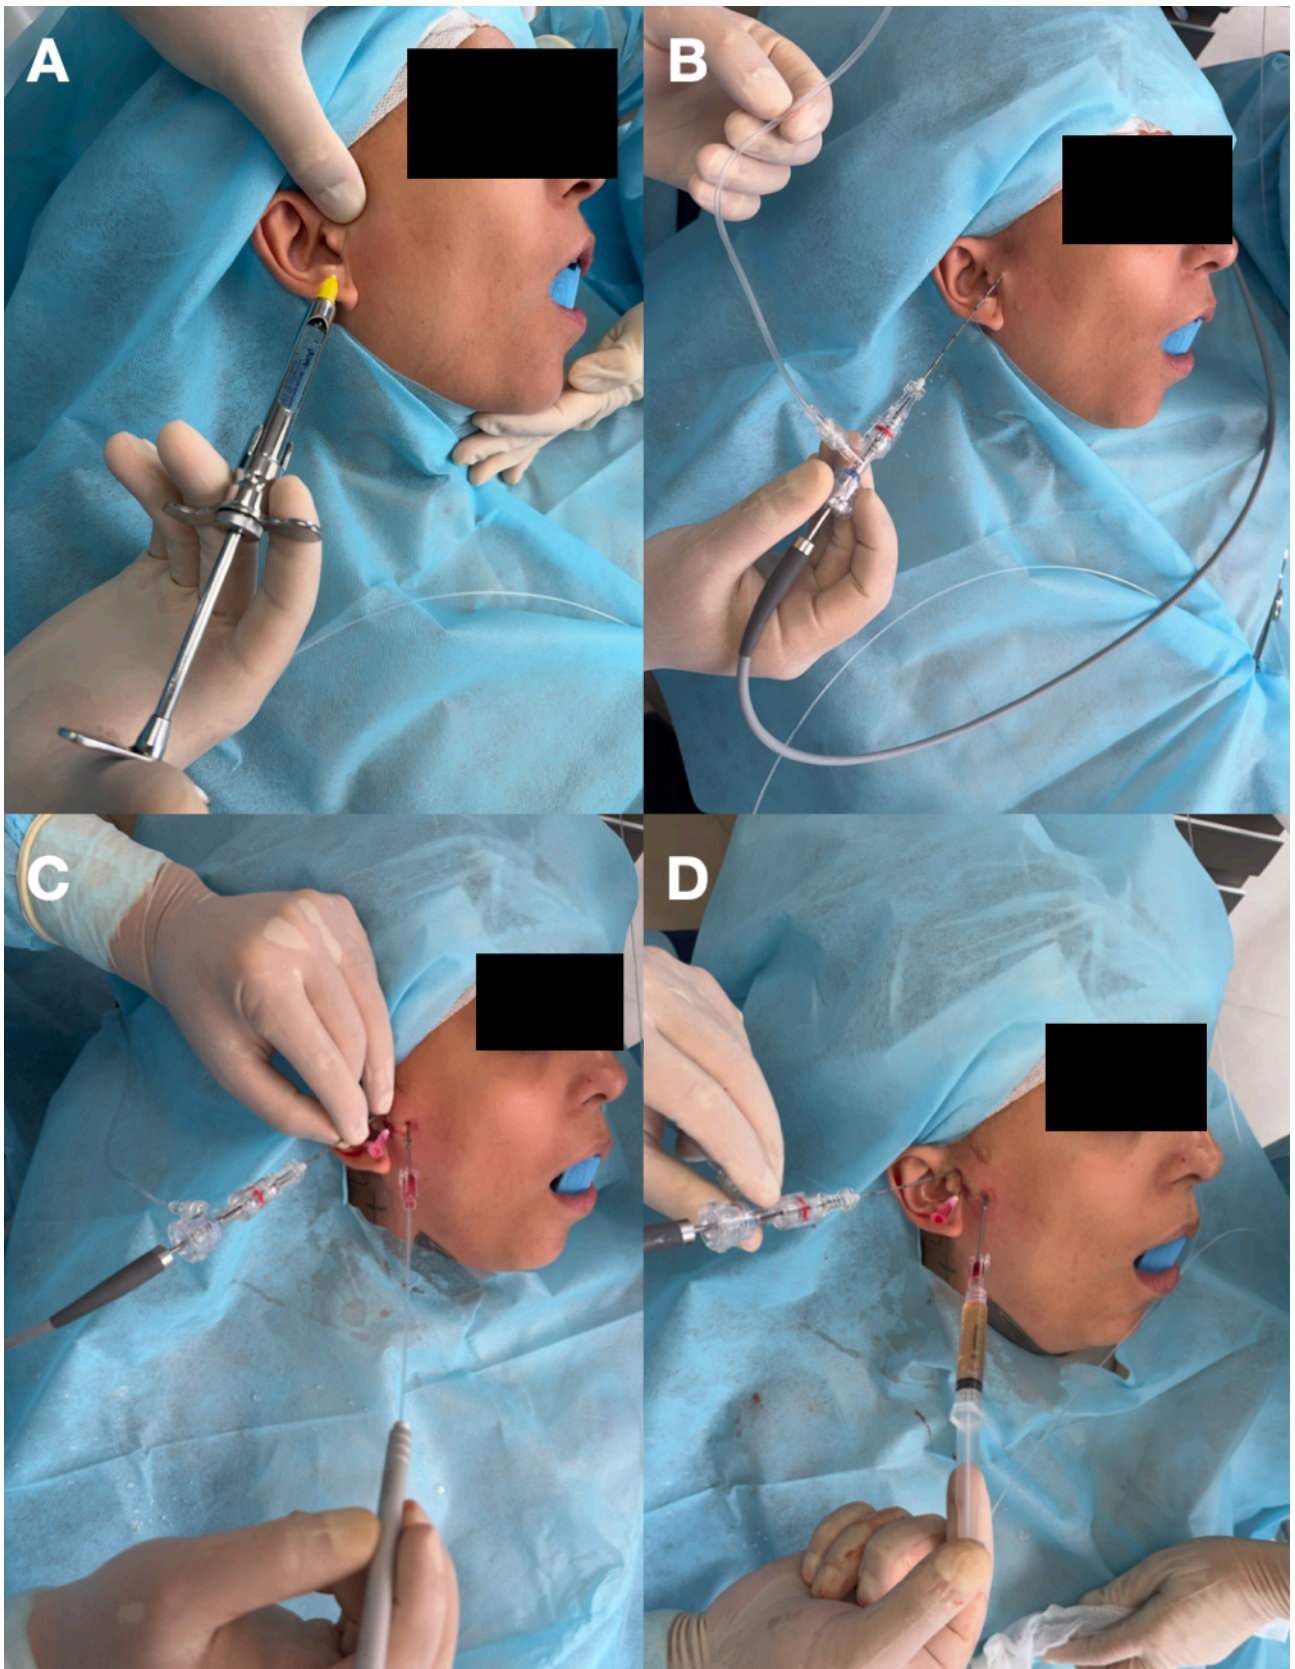

Supplementary figure 1. Surgical sequence of needle-based temporomandibular joint arthroscopy. (A) Local anesthesia infiltration. (B) Introduction of the 0.7-mm fiber-optic endoscope through a 16-gauge needle. (C) Placement of the second 16-gauge needle with a 600- $\mu$ m diode

laser fiber for targeted retrodiscal tissue ablation. (D) Platelet-rich fibrin (PRF) injection through the second needle following completion of laser treatment.

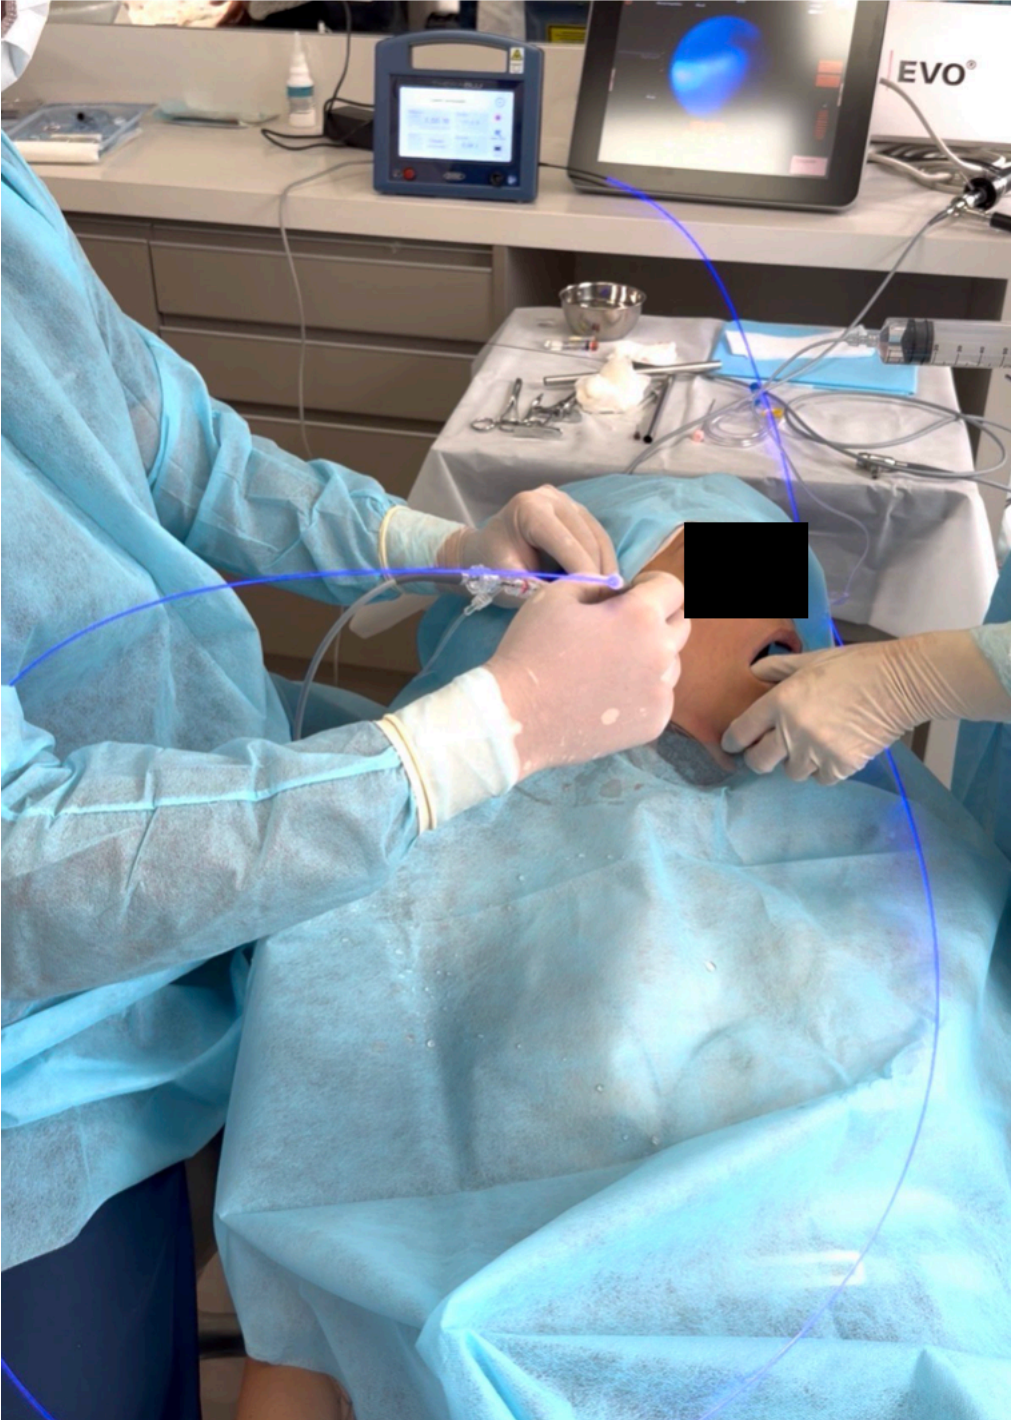

Supplementary figure 2. Office-based temporomandibular joint arthroscopy setup demonstrating intra-articular diode laser application through a 16-gauge needle portal under direct fiber-optic visualization.
